# Supplementary material for: The first 1D twofold interpenetrating metal–organic network generated by 1D triple helical chains with nanosized cages
Source: Royal Society of Chemistry journal article supplement (doi:10.1039/b709204k), 2007-01-01
Supplement: b709204k.pdf [file b709204k.pdf]

*Electronic Supplementary Information*

**The first 1D twofold interpenetrating metal-organic network  
generated by 1D triple helical chains with nanosized cages**

Caoyuan Niu, Benlai Wu, Xianfu Zheng, Hongyun Zhang,\* Zhongjun Li, and  
Hongwei Hou

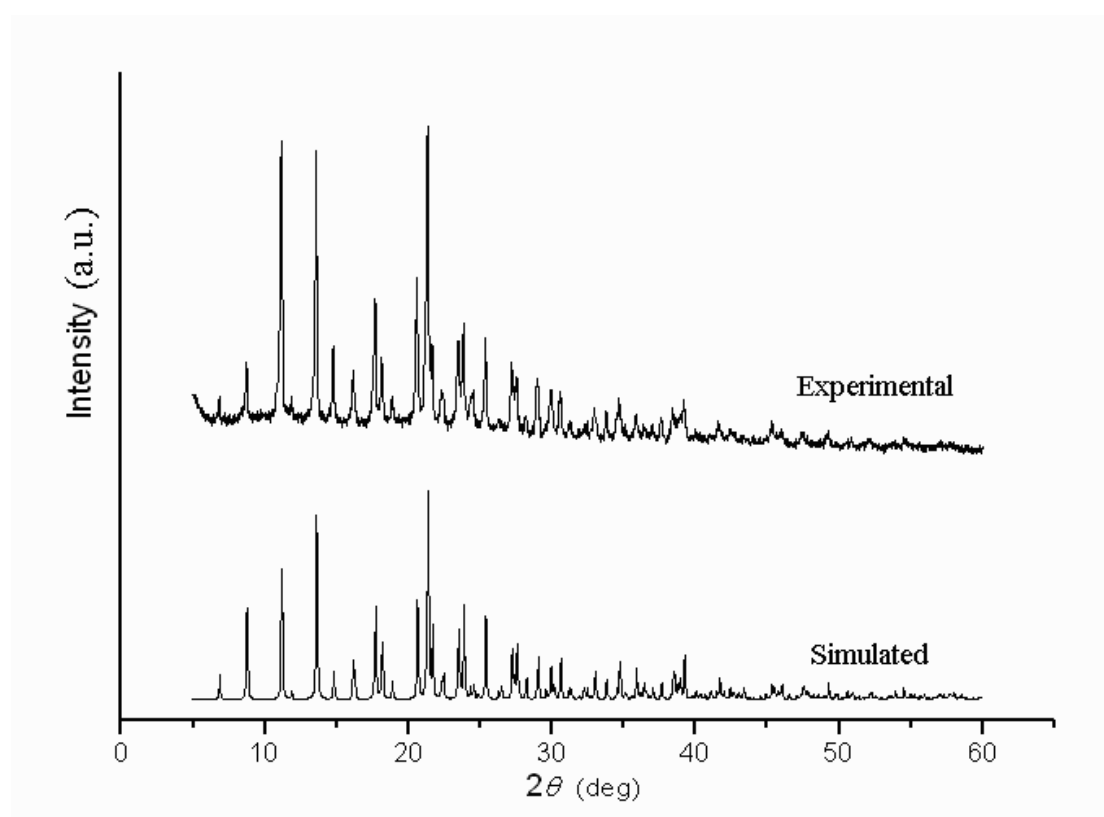

**Figure S1.** XPRD patterns for **2**: (a) powder diffraction pattern; (b) calculated pattern from single crystal X-ray data.

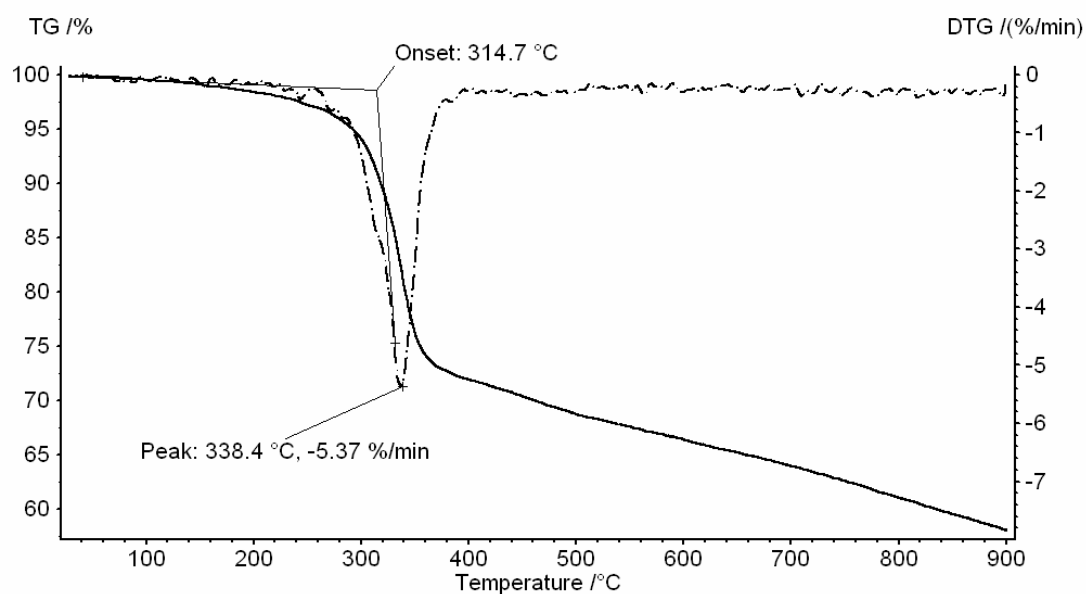

**Figure S2.** Thermogravimetric analysis curves of **2** under a argon atmosphere (a) TG curve (solid line); (b) DTG curve (dash dot line).

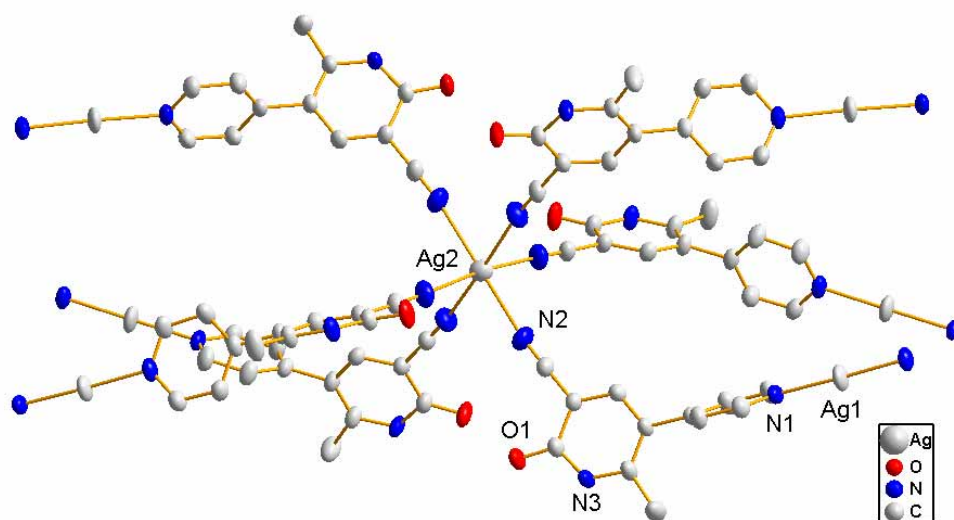

**Figure S3.** Partial view of the crystal structure of **2** (hydrogen atoms, methanol molecules and  $\text{PF}_6^-$  anions omitted for clarity).
